# Supplementary material for: Assessment of Preferences in Taking Painkillers among Students of Medicine, Dentistry, and Pharmacy: A Pilot Study
Source: Healthcare (Basel). 2024 Jan 13;12(2):196. doi: 10.3390/healthcare12020196 (PMC10815322; doi:10.3390/healthcare12020196)
Supplement: Supplementary file 1 [file healthcare-12-00196-s001.zip › healthcare-2798320-supplementary.pdf]

**Assessment of the preferences in the taking of painkillers among students of medicine, dentistry, and pharmacy**

1. Gender:
  - a. Female
  - b. Male
2. Field of study:
  - a. medicine
  - b. dentistry
  - c. pharmacy
3. Year of the study:
  - a. 1st
  - b. 2nd
  - c. 3rd
  - d. 4th
  - e. 5th
  - f. 6th
4. How often do you use painkillers?
  - a. Less than once per month
  - b. Once a month
  - c. Once a week
  - d. More than once a week
5. Pain threshold at which you use a painkiller:?
  - a. Very severe/unbearable pain
  - b. Severe pain
  - c. Medium/moderate pain
  - d. Mild pain
  - e. To prevent expected pain
6. Do you comply with the recommended doses of a drug?
  - a. yes
  - b. rather yes
  - c. rather no
  - d. no
7. What do you consider most important when choosing a painkiller?
  - a. fast onset of action
  - b. strength of analgesic effect
  - c. no side effects expected
  - d. long duration of analgesic effect
  - e. drug availability
  - f. price
8. Do you have contraindications to the use of painkillers?
  - a. Yes
  - b. No
9. Are you concerned about side effects when using mild painkillers?
  - a. Yes
  - b. No
10. What drug do you choose for acute pain?
  - a. ibuprofen
  - b. acetaminophen

- c. metamizole
  - d. acetaminophen combined with opioid
  - e. aspirin
11. Do you consider advertisements when choosing painkillers?
- a. No, never
  - b. Yes, sometimes
  - c. Yes, often
  - d. Yes, always
12. Where do you get information about individual painkillers from?
- a. studies curriculum
  - b. a drug leaflet
  - c. doctors and pharmacists
  - d. the Internet
  - e. friends and family
13. What is the most common side effect of painkillers?
- a. gastrointestinal complaints
  - b. headaches and dizziness
  - c. urticaria
  - d. anaphylactic shock
  - e. excessive sweating
14. Have you experienced toothache?
- a. Yes
  - b. No
15. What over-the-counter drug would you recommend for toothache?
- a. Ibuprofen
  - b. Acetaminophen
  - c. No, A prescription drug would be my first choice
  - d. I would not recommend any
  - e. Metamizole
  - f. Aspirin
16. What prescription drug would you recommend for toothache?
- a. Ketoprofen
  - b. Nimesulide
  - c. Tramadol
  - d. I wouldn't choose any prescription drug
  - e. Celecoxib
17. What is most important in combating dental pain with an analgesic?
- a. duration of action
  - b. fast onset of action
  - c. no or insignificant side effects
  - d. simultaneous anti-inflammatory effect
  - e. therapeutic safety
  - f. convenient drug presentation
  - g. Other
